# Supplementary material for: Sexually transmitted infections among patients attending a sexual assault centre: a cohort study from Oslo, Norway
Source: PubMed Central journal article supplement — BMJ Open. 2022 Dec 1;12(12):e064934. doi: 10.1136/bmjopen-2022-064934 (PMC9716778; doi:10.1136/bmjopen-2022-064934), 2022-12-01
Supplement: bmjopen-2022-064934supp002.pdf [file bmjopen-2022-064934supp002.pdf]

**Supplementary table 2. Treatment for sexually transmitted infections among patients attending a sexual assault centre in Oslo, Norway**

|                                                  | First treatment                                    |                | Test after initial treatment | Second treatment         |   | Test after second treatment |
|--------------------------------------------------|----------------------------------------------------|----------------|------------------------------|--------------------------|---|-----------------------------|
| <b>Chlamydia trachomatis</b>                     |                                                    |                |                              |                          |   |                             |
| 58                                               | Azithromycin                                       | 25             | Negative 6<br>Positive 7     | Doxycycline              | 7 | Negative 3                  |
|                                                  | Doxycycline                                        | 23             | Negative 14<br>Positive 2    | Doxycycline              | 1 |                             |
|                                                  | Moxifloxacin                                       | 1 <sup>a</sup> | Positive 1                   | Azithromycin             | 1 | Positive 1                  |
|                                                  | Unspecified <sup>b</sup>                           | 7              | Negative 4                   | Doxycycline              | 1 | Negative 1                  |
|                                                  | No information                                     | 2              |                              |                          |   |                             |
| <b>Mycoplasma genitalium</b>                     |                                                    |                |                              |                          |   |                             |
| 24                                               | Azithromycin                                       | 13             | Negative 8                   |                          |   |                             |
|                                                  | Moxifloxacin                                       | 1              | Negative 1                   |                          |   |                             |
|                                                  | Doxycycline                                        | 3              | Positive 2<br>Negative 1     | Azithromycin             | 1 |                             |
|                                                  | Unspecified <sup>b</sup>                           | 4              | Negative 3                   |                          |   |                             |
|                                                  | No information                                     | 3              | Negative 2                   |                          |   |                             |
| <b>Mycoplasma genitalium macrolide resistant</b> |                                                    |                |                              |                          |   |                             |
| 21                                               | Azithromycin                                       | 4              |                              | Moxifloxacin             | 1 | Negative 1                  |
|                                                  |                                                    |                |                              | Unspecified <sup>b</sup> | 1 |                             |
|                                                  | Moxifloxacin                                       | 10             | Negative 9                   |                          |   |                             |
|                                                  | Unspecified <sup>b</sup>                           | 2              | Negative 2                   |                          |   |                             |
|                                                  | No information                                     | 5              | Negative 2                   |                          |   |                             |
| <b>Neisseria gonorrhoeae</b>                     |                                                    |                |                              |                          |   |                             |
| 5                                                | Treated at specialist venereal clinic <sup>b</sup> | 4              |                              |                          |   |                             |
|                                                  | No information                                     | 1              |                              |                          |   |                             |

Total numbers at the primary examination and during follow-up: genital *Chlamydia trachomatis* in 58 patients, amongst whom 25 (43.1%) had symptoms; *Mycoplasma genitalium* in 45 patients, amongst whom 19 (42.2%) had symptoms; and *Neisseria gonorrhoeae* in 5 patients, amongst whom 2 (40.0%) had symptoms.

Missing data not shown for second treatment and tests after treatment.

<sup>a</sup>Co-infection with macrolide resistant *Mycoplasma genitalium*.

<sup>b</sup>Antibiotic treatment, drug not specified.

Among patients with no information about treatment, several may have received treatment elsewhere.
